# Supplementary material for: Tailoring phase and composition at the nanoscale: atomic layer deposition of Zn–Ti–O thin films
Source: Royal Society of Chemistry journal article supplement (doi:10.1039/c1ce05923h), 2011-01-01
Supplement: c1ce05923h.pdf [file c1ce05923h.pdf]

## SUPPORTING INFORMATION

### *Tailoring phase and composition at the nanoscale: atomic layer deposition of Zn-Ti-O thin films*

L. Borgese, E. Bontempi, L. E. Depero, P. Colombi and I. Alessandri

#### **S1 Experimental**

##### *ALD and annealing*

Optimal conditions for depositing ZnO and TiO<sub>2</sub> at 90°C were obtained by our previous studies (*see* references 8 and 9 and references therein). Experimental deposition temperature and pressure were 90°C and 0.5 Torr, respectively. All the thin films were grown by ALD in a continuous-flow mode onto natively oxidized 100 boron doped Si wafer (Siltronic AG, Germany) in a Savannah-100 ALD flow reactor (Cambridge Nanotech Inc., MA). Before deposition the substrates were thoroughly cleaned with acetone (Aldrich) and placed for 5 minutes at 50°C in a UV cleaner (PSD-UVT Novascan Technologies, Inc., USA). Metal precursors for ALD were tetrakis(dimethylamido)titanium(IV) (TDMAT - 99.999%; Sigma-Aldrich, Germany), as titanium source and diethylzinc (DEZ; 99.999%; Sigma-Aldrich, Germany) as zinc source. Oxygen source is ultrapure water (H<sub>2</sub>O - Conductivity 0.054 mS/cm) produced directly from tap water with a Direct-Q system (Millipore, Italy). All the reagents effused from stainless-steel reservoirs held respectively at 90°C (TDMAT) and at room temperature, 25°C, (DEZ and H<sub>2</sub>O which have higher vapor pressure). All the reagents are fed into the reactor through solenoid valves by a carrier gas, Nitrogen (99.9999% Praxair Inc., USA), used also as purging gas.

The processing cycle for the deposition of TiO<sub>2</sub> consists in 0.1 s pulse of TDMAT, 10 s purging time with N<sub>2</sub>, 0.015 s pulse of H<sub>2</sub>O, and 10 s purging time with N<sub>2</sub>. The processing cycle for the

deposition of ZnO consists in 0.1s pulse of DEZ, 10s purging time with N<sub>2</sub>, 0.015 s pulse of H<sub>2</sub>O, and 10 s purging time with N<sub>2</sub>.

The scheme of the ALD reactor and the reactions occurring in ALD process are reported below:

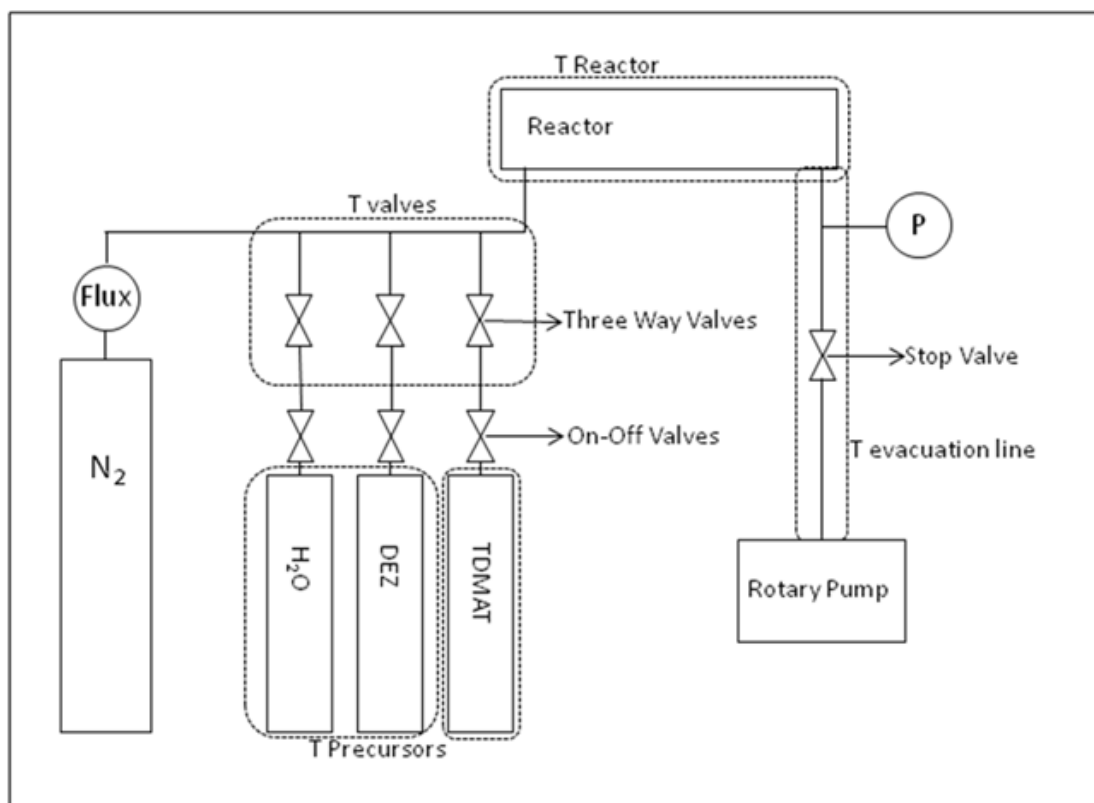

TiO<sub>2</sub>-layer:

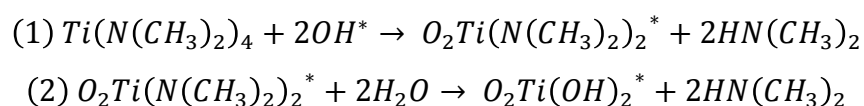

ZnO-layer:

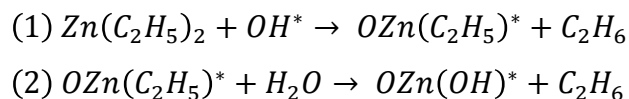

The as-deposited samples were annealed in air for 6 and 12 hours at 600°C in a Carbolite furnace. A preliminary *in situ* XRD study of thin film crystallization as a function of the annealing temperature was performed at the MCX beamline (ELETTRA Synchrotron, Trieste).

### *XRR*

X-ray reflectivity (XRR) measurements are performed in a 'D8 Advance' diffractometer (Bruker GmbH, Germany) equipped with a Göbel mirror and a CuK $\alpha$  radiation tube ( $\lambda = 0,154$  nm). The beam is collimated by slits; the cross section of the X-ray beam behind the slit is 600  $\mu\text{m}$  high and 1.5 cm wide. All XRR spectra are analyzed with the REFSIM software (Bruker GmbH, Germany) to extract thickness and density of the deposited films.

### *TXRF*

Thin films composition is analyzed by a S2 Picofox total reflection x-ray fluorescence (TXRF) spectrometer (Bruker GmbH, Germany), equipped with well-focussing polycapillary lens and X-ray beam dimension about 8 x 0.1 mm<sup>2</sup>. Excitation settings are 50 kV and 750 mA. 600-s measurements are performed.

### *XRD*

Micro X-ray diffraction ( $\mu\text{XRD}$ ) images for phase identification are collected by a D/max-RAPID micro-diffractometer (Rigaku, Japan) with Cu K $\alpha$  radiation. This system is equipped with a cylindrical imaging plate (IP) detector, which can record 2 dimensions X-ray diffraction data in angular diffraction ranges from  $-45^\circ$  to  $160^\circ$  ( $2\theta$ ) horizontally and  $\pm 45^\circ$  ( $2\theta$ ) vertically with respect to the direct beam position ( $0^\circ$ ). The irradiated area can be chosen by using collimators of diameters ranging from 800 down to 10 microns. In the experiments, the diameter of the collimator is 300 microns.

### *AFM*

Morphological analysis is performed by means of atomic force microscopy (AFM). The measurements are carried out by means of a JSPM 4210 (Jeol, Japan) scanning probe microscope (SPM) equipped with a wide-area scanner (maximum xy-movement = 50  $\mu\text{m}$ ; maximum z-movement = 8  $\mu\text{m}$ ) and a four-segment photodetector for cantilever deflection monitoring. The

images are recorded in a  $10 \times 10 \mu\text{m}^2$  area and roughness average (Ra) is calculated on the same area.

### *HRTEM*

High Resolution Transmission Electron microscopy (HRTEM) was performed with a JEM 2010 microscope (Jeol, Japan).

## S2 Compositional Analysis (TXRF)

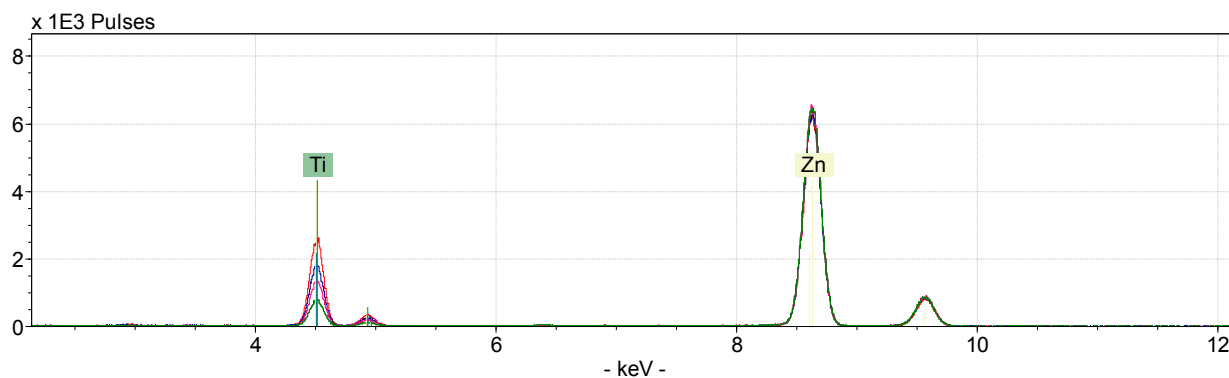

**Figure S1.** TXRF spectra of samples 1Ti:1Zn (green), 2Ti:1Zn (pink), 3Ti:1Zn (blue) and 4Ti:1Zn (red) normalized on the Zn content.

Samples composition and relative errors were calculated as the average of four values for each sample.

A comparison between experimental and expected thin films composition is reported in **Figure S2**.

The expected composition is calculated on the basis of experimental growth-per-cycle (GPC) of pure  $\text{TiO}_2$  and  $\text{ZnO}$ , oxides bulk densities, metals and metal oxides masses. The data lay on a line whose slope is very near to one, demonstrating a very good agreement between the two data sets.

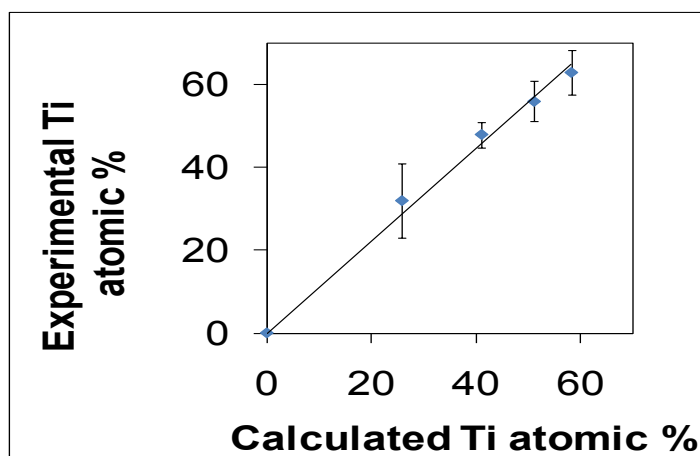

**Figure S2.** Experimental composition, measured by TXRF, as a function of composition calculated by GPC of pure oxides, metals and oxides masses and densities.

### S3. XRR

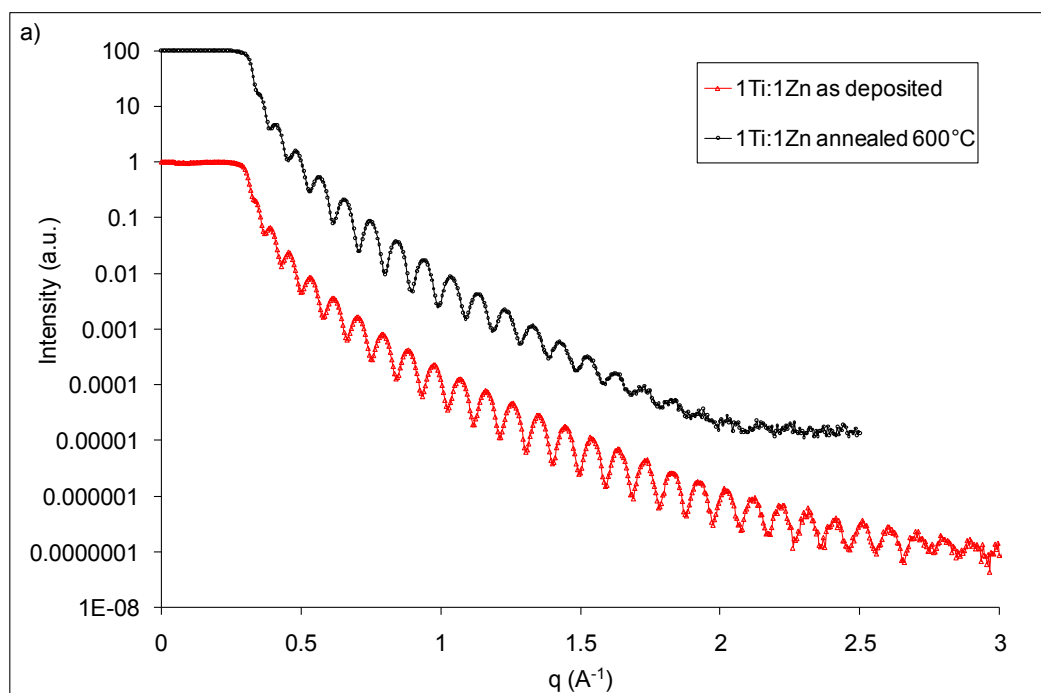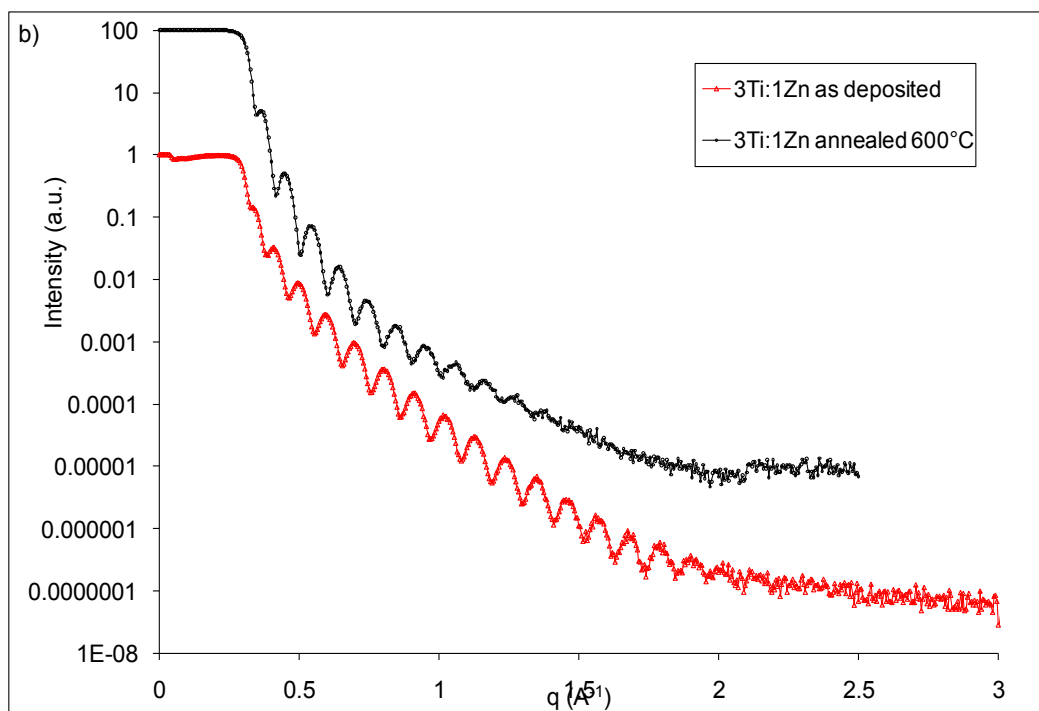

**Figure S3.a** XRR spectra measured on a) sample 1Ti:1Zn and b) sample 3Ti:1Zn, both as deposited (red) and annealed (black).

The ALD characteristics linearity of as deposited thin films thickness versus the number of cycles is verified by all zinc titanate series (see **Figure S3.b**)

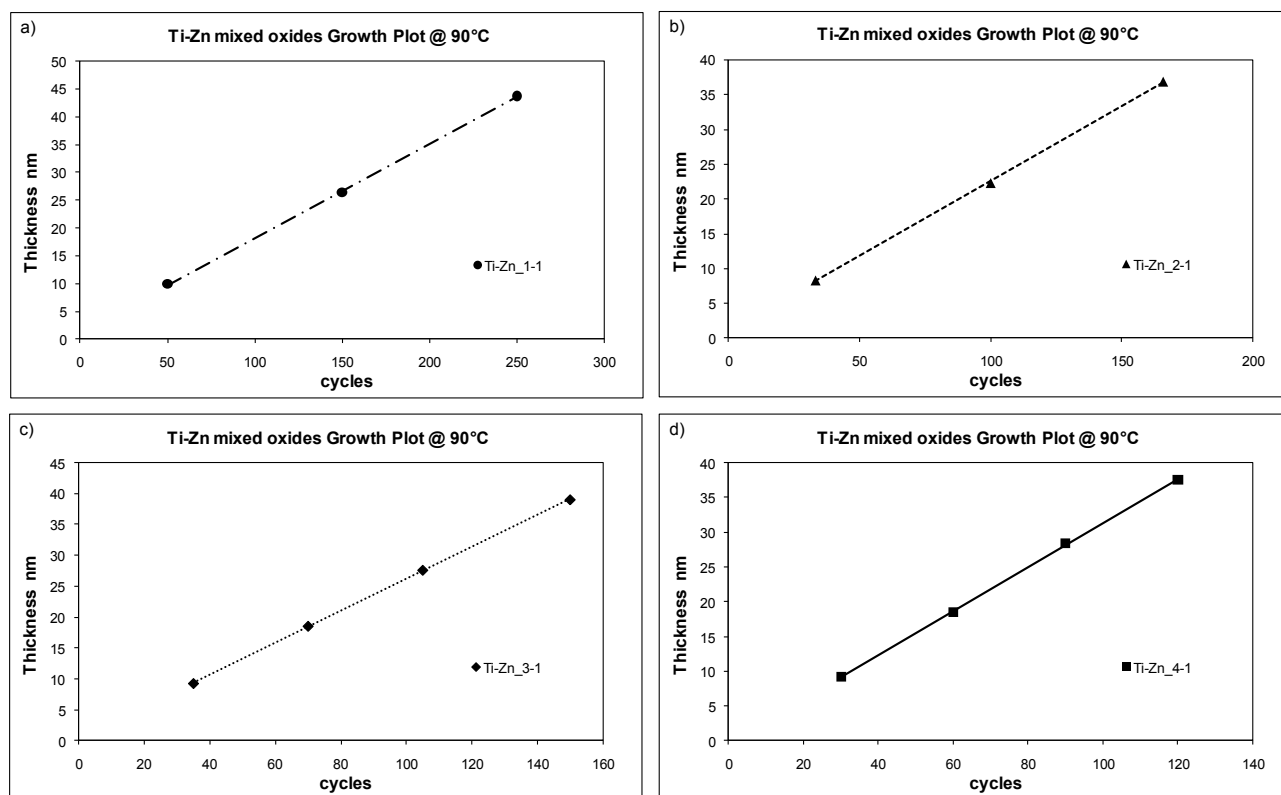

**Figure S3.b** Thickness measured by XRR as a function of ALD cycles for all the sample compositions: a) 1Ti:1Zn; b) 2Ti:1Zn; c) 3Ti:1Zn; d) 4Ti:1Zn

#### S4 Moiré fringes in 1Ti:1Zn samples

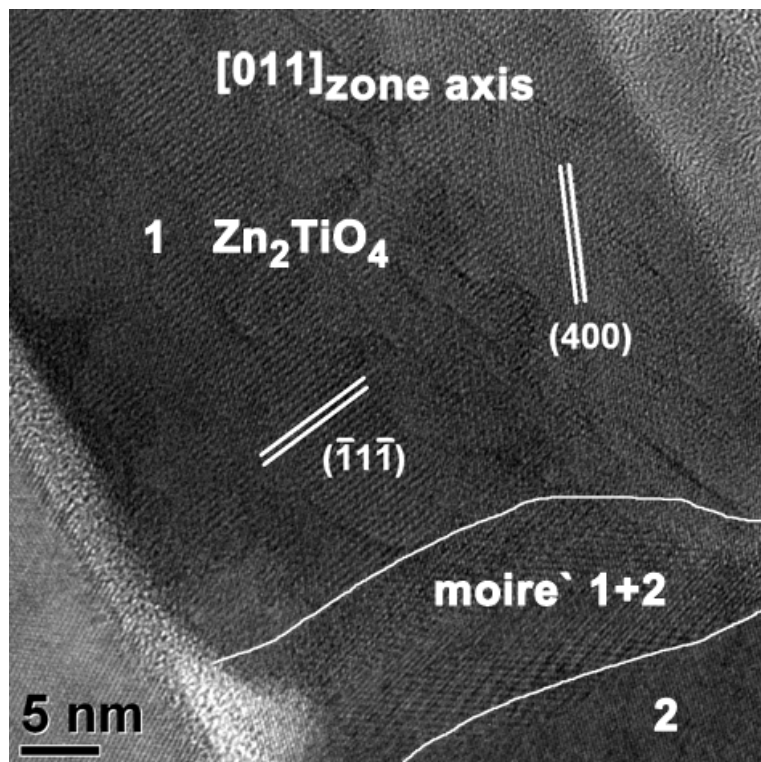

**Figure S4.** HRTEM images of sample 1Ti:1Zn viewed close to a [011] zone-axis, showing the (400) and ( $\bar{1}\bar{1}\bar{1}$ ) lattice planes. Moiré fringes can be observed at the superposition between crystal domains 1 and 2. (See the text for details).



## S5. Compositional Analysis (EDS-HAADF-STEM)

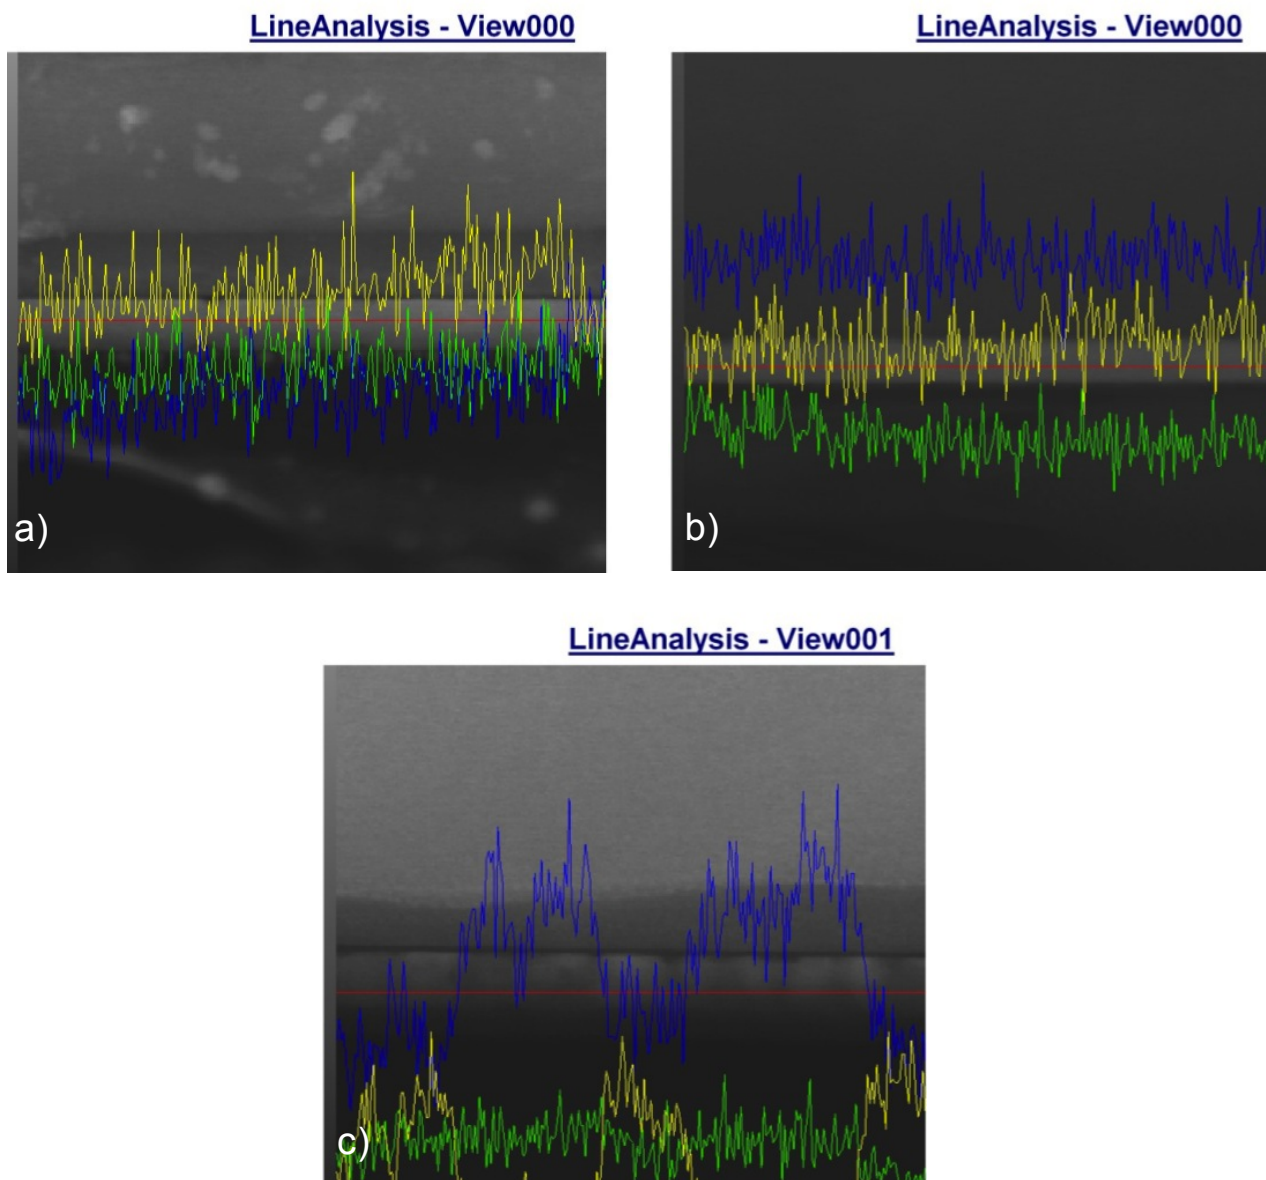

**Figure S5.** Compositional analysis (EDS) obtained with STEM/HAADF for sample a) 1Ti:1Zn; b) 2Ti:1Zn; c) 4Ti:1Zn. Colored lines represent the spatial distribution of each element ( $K\alpha$  lines): green-oxygen, yellow-zinc and blue-titanium. See the text for further details.
